# Supplementary material for: Ultra-low intensity light pulses for large cargo delivery into hard-to-transfect cells using an rGO mixed PDMS microtip device
Source: Royal Society of Chemistry journal article supplement (doi:10.1039/d4lc00121d), 2024-01-01
Supplement: d4lc00121d1.pdf [file d4lc00121d1.pdf]

# Supporting Information

## Ultra-Low Intensity Light Pulses for Large Cargo Delivery into Hard-to-Transfect Cells using rGO Mixed PDMS Microtip Device

Hima Harshan Padma <sup>a</sup>, Kavitha Illath <sup>a</sup>, Donia Dominic <sup>a</sup>, Hwan-You Chang <sup>b</sup>, Moeto Nagai <sup>c</sup>, Rajdeep Ojha <sup>d</sup>, Srabani Kar <sup>e</sup>, Tuhin Subhra Santra <sup>a\*</sup>

<sup>a</sup> Department of Engineering Design, Indian Institute of Technology Madras, India

<sup>b</sup> Department of Medical Science, National Tsing Hua University, Taiwan

<sup>c</sup> Department of Mechanical Engineering, Toyohashi University of Technology

<sup>d</sup> Department of Physical Medicine and Rehabilitation, Christian Medical College, Vellore, India

<sup>e</sup> Department of Physics, Indian Institute of Science Education and Research Tirupati, India

\*[tuhin@iitm.ac.in](mailto:tuhin@iitm.ac.in) & [santra.tuhin@gmail.com](mailto:santra.tuhin@gmail.com)

**Table S1:** The summary of notable works on NPs-mediated photoporation

| NPs Material               | Laser Wavelength (nm) | Laser energy/Fluence     | Exposure time | Molecules                              | Cells                                           | No: of cell/Cell volume | Efficiency (%) | Viability (%) | Ref.         |
|----------------------------|-----------------------|--------------------------|---------------|----------------------------------------|-------------------------------------------------|-------------------------|----------------|---------------|--------------|
| Cationic PDDAC-coated gold | 561                   | 0.9 J cm <sup>-2</sup>   | ~ 3 min       | eGFP-mRNA delivery                     | Jurkat T cells                                  | -                       | 24             | 14            | <sup>1</sup> |
| Gold                       | 532                   | 1.60 J/cm <sup>2</sup>   | 3 min         | Cas9 ribonucleoprotein (RNP) complexes | lung epithelial cell line-H1299                 | -                       | 96             | 80            | <sup>2</sup> |
| Carbon-black               | 1064                  | 25-29 mJ/cm <sup>2</sup> | 4-5 min       | Dextran 4kDa<br>Dextran 2000 kDa       | DU145 prostate cancer                           | -                       | 43<br>18       | 55<br>25      | <sup>3</sup> |
| Gold NPs layer             | 808                   | 1 W cm <sup>-2</sup>     | 300 s         | Dextran                                | mouse embryonic fibroblasts (mEFs)              | -                       | 53 & 19        | 80 & 88       | <sup>4</sup> |
|                            |                       |                          |               | plasmid DNA                            | human umbilical vein endothelial cells (HUVECs) | -                       | 44 & 8         | 90 & 87       |              |

|                                |     |                        |                           |                   |                            |                 |                                     |                                     |              |
|--------------------------------|-----|------------------------|---------------------------|-------------------|----------------------------|-----------------|-------------------------------------|-------------------------------------|--------------|
| Gold                           | 561 | 0.96 J/cm <sup>2</sup> | 7s                        | Dextran 10 kDa    | primary human CD4+ T cells | -               | 62                                  | 32                                  | 5            |
| rGO-PEG                        | 800 | 0.89 J/cm <sup>2</sup> | 2.1 mm/s (scanning speed) | Dextran 10 kDa    | HeLa                       | -               | 80                                  | 80                                  | 6            |
| rGO mixed PDMS microtip device | 900 | 0.9J/cm <sup>2</sup>   | 5s                        | PI Dextran Enzyme | SiHa                       | 80,000 ± 20,000 | <b>96</b><br><b>97</b><br><b>95</b> | <b>97</b><br><b>97</b><br><b>98</b> | Present work |

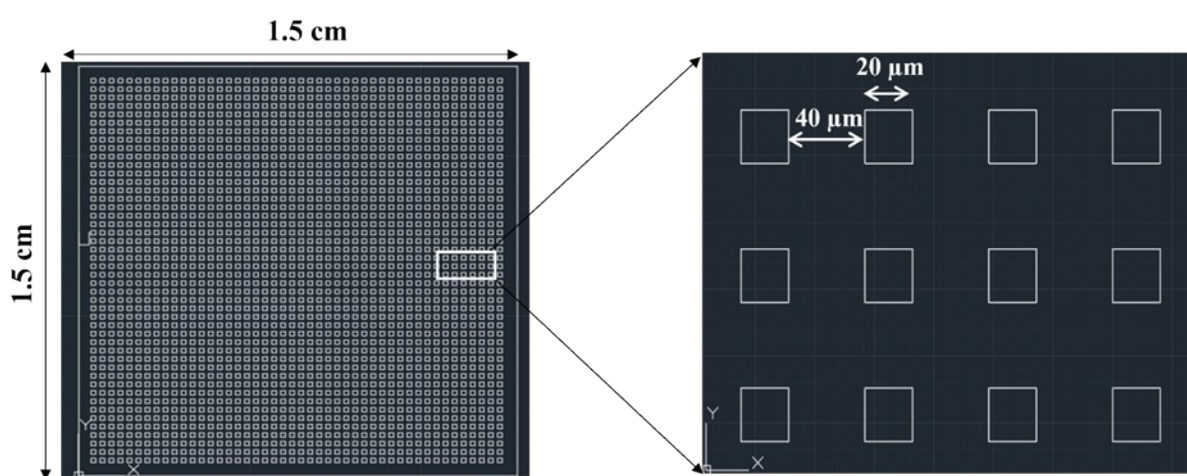

**Fig S1:** AutoCAD design of square pattern for microtip device with overall dimension of  $1.5 \times 1.5 \text{ cm}^2$ .  $20 \times 20 \text{ μm}^2$  individual square dimension and  $40 \text{ μm}$  of edge-to-edge distance between the adjacent squares.

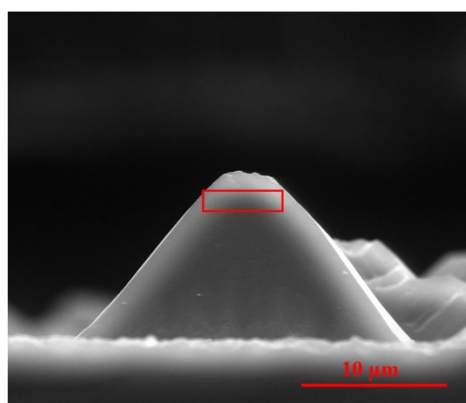

| <i>Element</i> | <i>Wt%</i> | <i>At%</i> |
|----------------|------------|------------|
| <i>CK</i>      | 56.46      | 69.88      |
| <i>OK</i>      | 21.15      | 19.94      |
| <i>SiK</i>     | 26.39      | 14.17      |
| <i>Matrix</i>  | Correction | ZAF        |

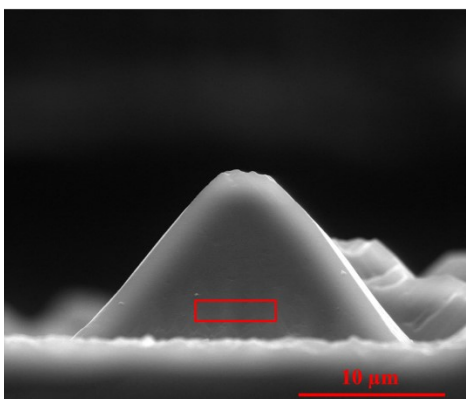

| <i>Element</i> | <i>Wt%</i> | <i>At%</i> |
|----------------|------------|------------|
| <i>CK</i>      | 37.19      | 47.09      |
| <i>OK</i>      | 20.32      | 24.99      |
| <i>SiK</i>     | 36.49      | 21.36      |
| <i>Matrix</i>  | Correction | ZAF        |

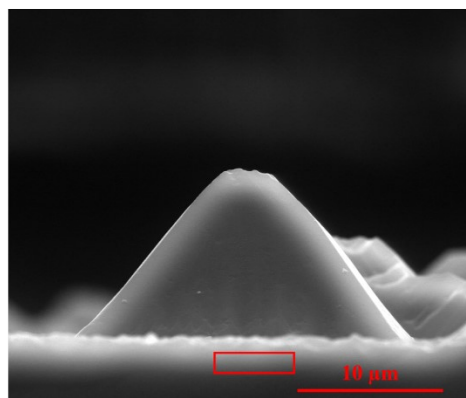

| <i>Element</i> | <i>Wt%</i> | <i>At%</i> |
|----------------|------------|------------|
| <i>CK</i>      | 33.11      | 44.75      |
| <i>OK</i>      | 21.09      | 28.54      |
| <i>SiK</i>     | 37.98      | 26.71      |
| <i>Matrix</i>  | Correction | ZAF        |

**Fig S2:** SEM-EDAX characterisation of rGO mixed pyramidal microtip device. SEM images (left column) and elemental distribution results (right column) of red squared area in the corresponding image. The scale bar shown here cannot be correlate with the device dimension, because of the distance and angle in capturing the image.

**Table S2:** Summary of parameters used in the COMSOL simulation of rGO mixed PDMS microtip device

| Parameter                                                  | Value                                                                                                | Ref.  |
|------------------------------------------------------------|------------------------------------------------------------------------------------------------------|-------|
| $C_1$                                                      | $0.7 \text{ J (kg K)}^{-1}$                                                                          | 7     |
| Density of rGO, $\rho_r$                                   | $2267 \text{ kg/m}^3$                                                                                | 8     |
| RGO electron-acoustic phonon cooling rate, $\Gamma_{e-ph}$ | $C_p / 2 \text{ ps}$ , 2ps is taken to be average heat transfer rate from carrier to acoustic phonon | 9     |
| Graphene/water heat transfer coefficient                   | $30 \text{ MW m}^{-2} \text{K}^{-1}$                                                                 | 10,11 |
| Graphene/PDMS heat transfer coefficient                    | $3 \text{ W m}^{-2} \text{K}^{-1}$                                                                   | 12    |
| Water density, $\rho_w$                                    | $997 \text{ kg/m}^3$                                                                                 |       |
| PDMS density, $\rho_w$                                     | $970 \text{ kg/m}^3$                                                                                 |       |
| Graphene electronic thermal conductivity                   | $2500 \text{ W (m K)}^{-1}$                                                                          | 7     |
| Graphene lattice thermal conductivity                      | $2000 \text{ W (m K)}^{-1}$                                                                          | 13    |
|                                                            |                                                                                                      |       |

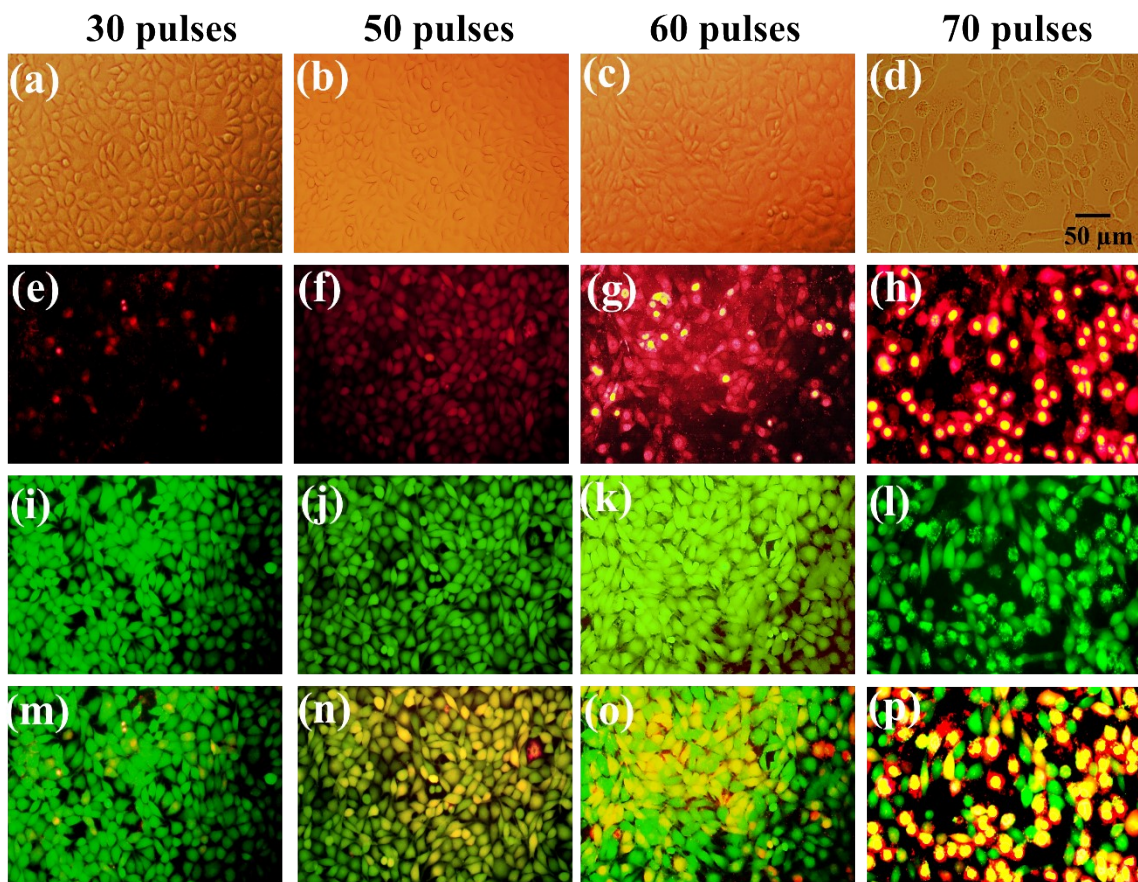

**Fig S3:** Microscopic images after performing photoporation (900 nm,  $0.9 \text{ mJ/cm}^2$ ) under various number of pulses in delivering PI into L929 cells.

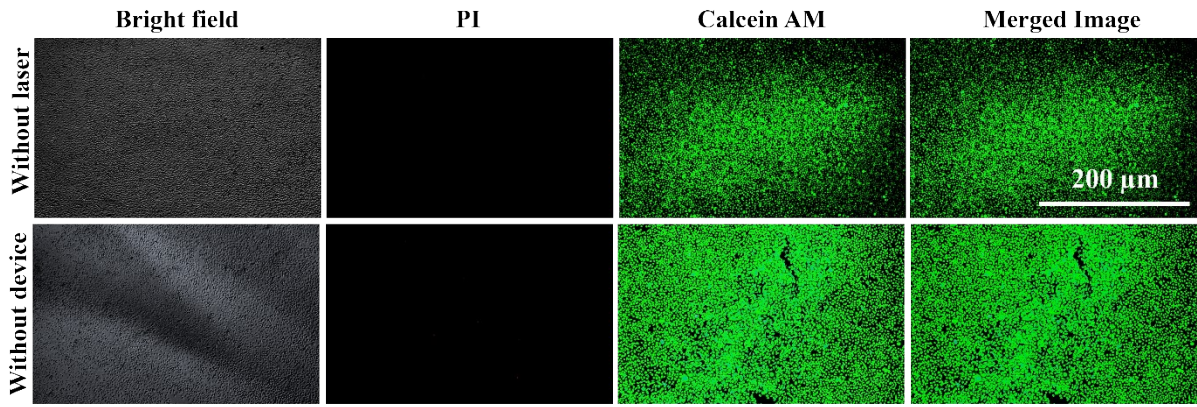

**Fig S4: PI delivery in controls.** Images captured after performing photoporation without rGO mixed PDMS pyramidal microtip device (top row) and with device in the absence of laser

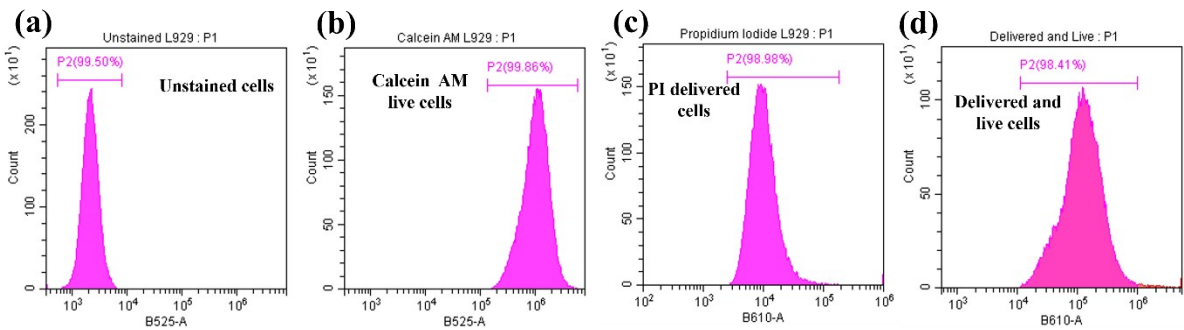

**Fig S5:** Flow cytometry-based histogram in L929 showing (a) unstained cells, (b) calcein AM stained live cells, (c) PI delivered cells, and (d) dual stained PI delivered and live cells.

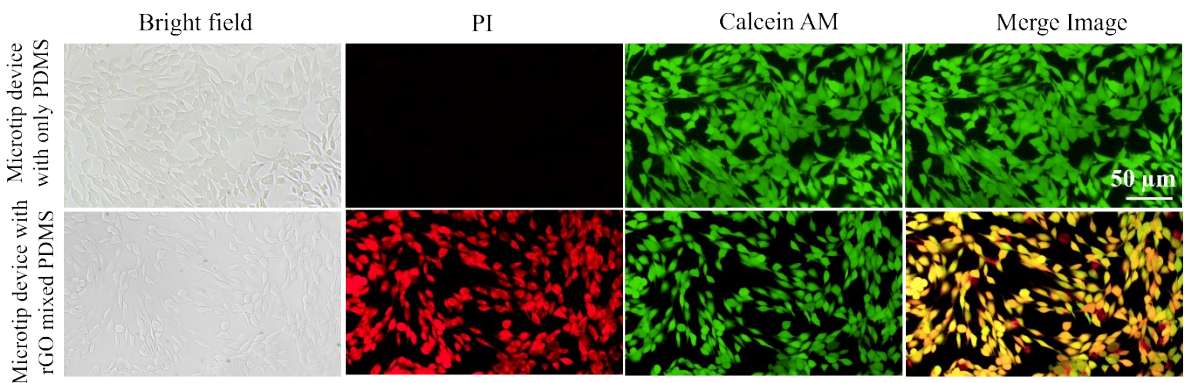

**Fig S6: Photoporation results after with PDMS and with rGO mixed PDMS Microtip device.** Images captured after performing photoporation with PDMS Microtip device (top row) and with rGO mixed PDMS pyramidal microtip device

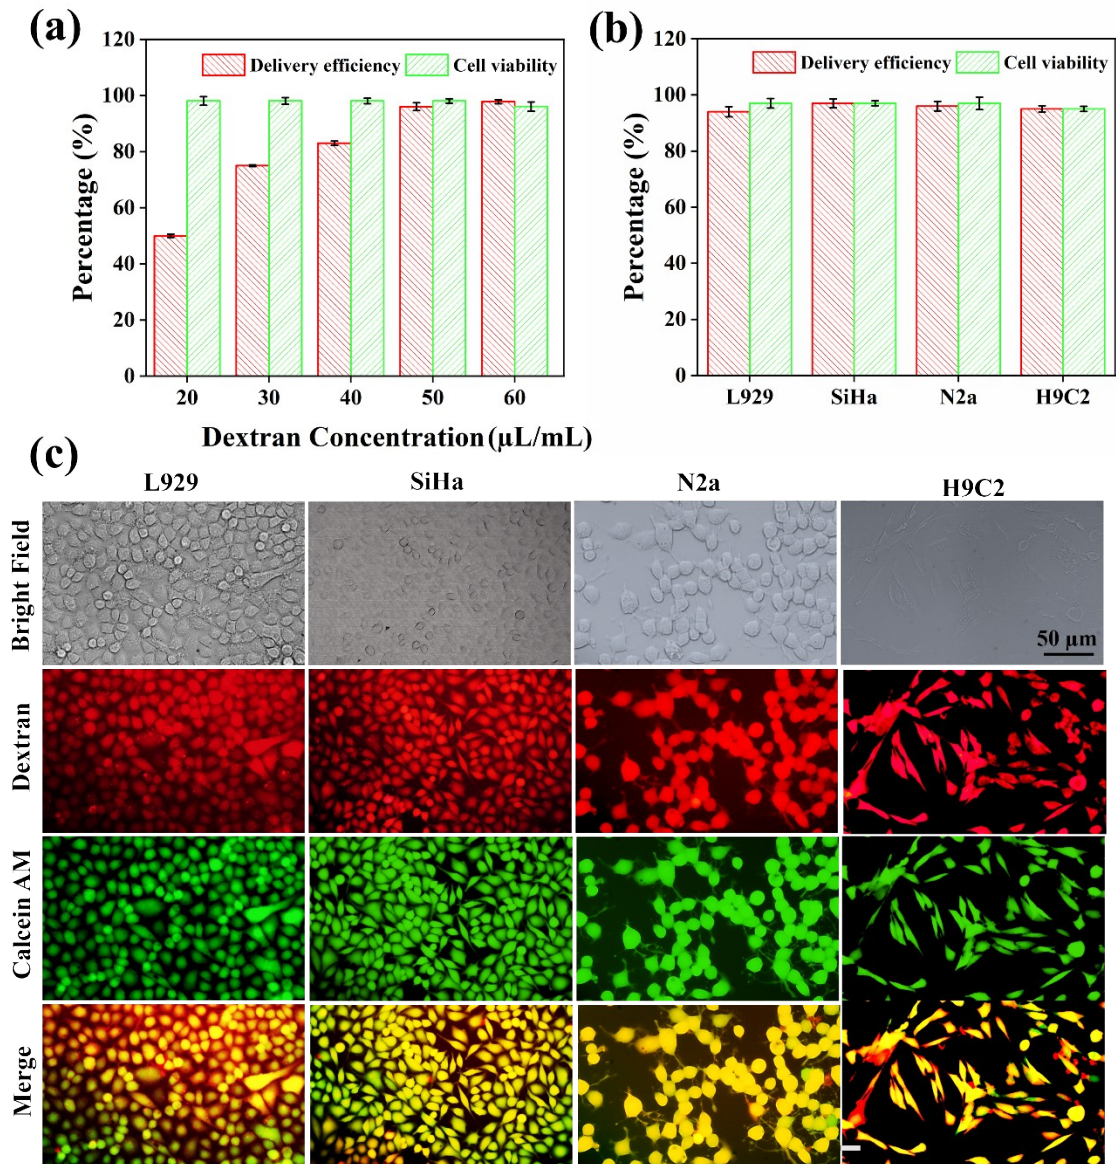

**Fig S7: Delivery of Dextran 3000 Da.** (a) assessment of delivery efficiency and cell viability with different dextran concentrations into L929 cells at a laser energy of 0.25 mJ for 50 pulses, (b) quantification of delivery efficiency and cell viability after dextran delivery into L929, SiHa, N2a and H9C2 cells ( $n = 3$  independent experiments, data presented as mean  $\pm$  S.D.), (c) microscopic images of cells after dextran (3000 Da) delivery using the rGO-PDMS microtip device assisted photoporation into L929, SiHa, N2a, H9C2 cells.

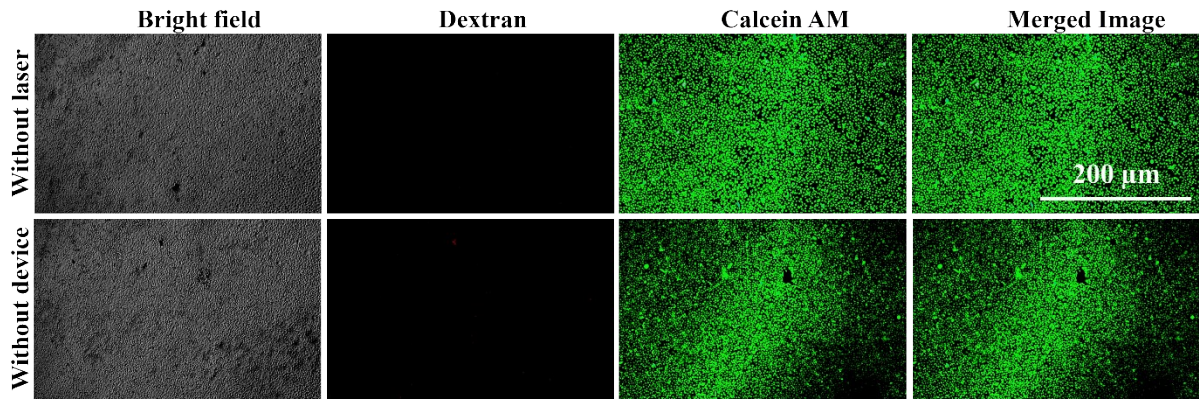

**Fig S8: Dextran delivery in controls.** Images captured after performing photoporation without rGO mixed PDMS pyramidal microtip device (top row) and with device in the absence of laser.

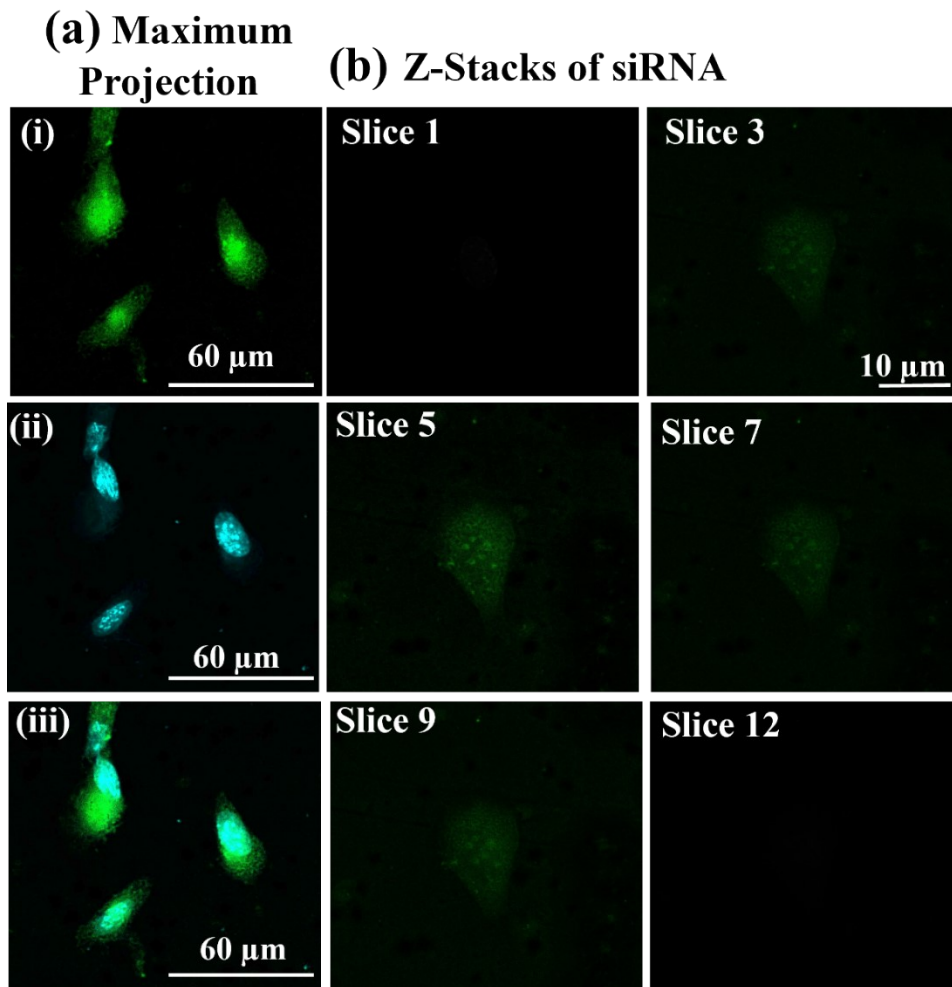

**Fig S9:** Confocal scanning images of 3T3 cells after siRNA delivery (a) maximum projection (i) siRNA delivery, (ii) nucleus staining due to Hoechst 33342 and (iii) merged image and (b) 12 slices which are equally divided and confirms the successful delivery using rGO mixed PDMS microtips device based photoporation.

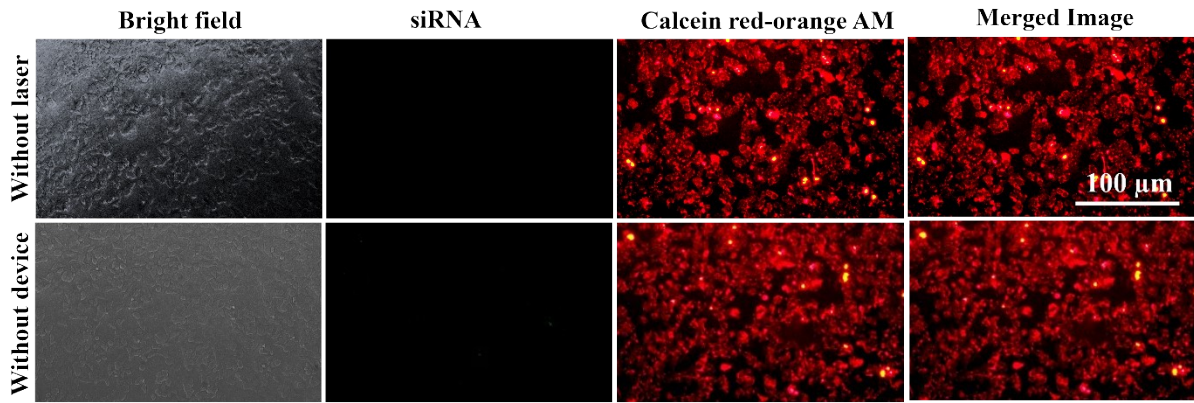

**Fig S10: siRNA delivery in controls.** Images captured after performing photoporation without rGO mixed PDMS pyramidal microtip device (top row) and with device in the absence of laser.

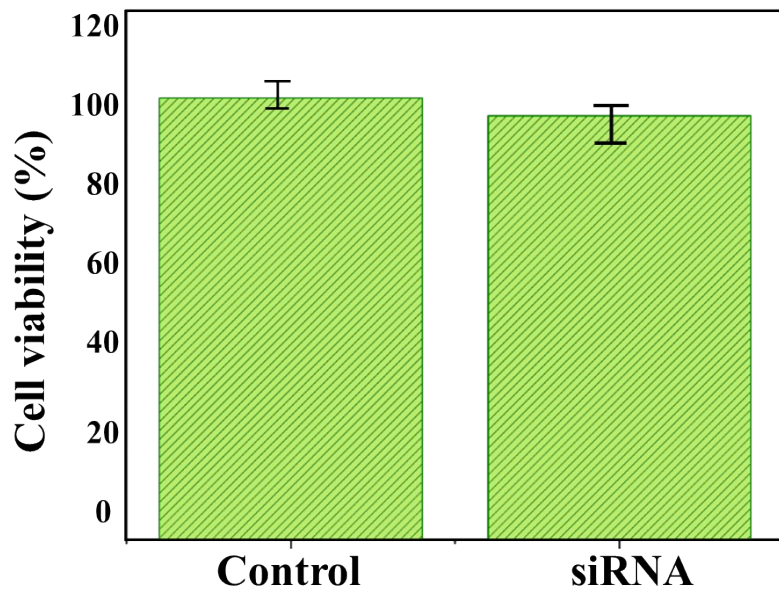

**Fig S11: Cell viability results in L929 cells using MTT assay 24 hrs. after laser exposure with wavelength at 900 nm, fluence of 0.9 mJ/cm<sup>2</sup>, and 50 pulses for siRNA delivery using rGO mixed PDMS microtip device.**

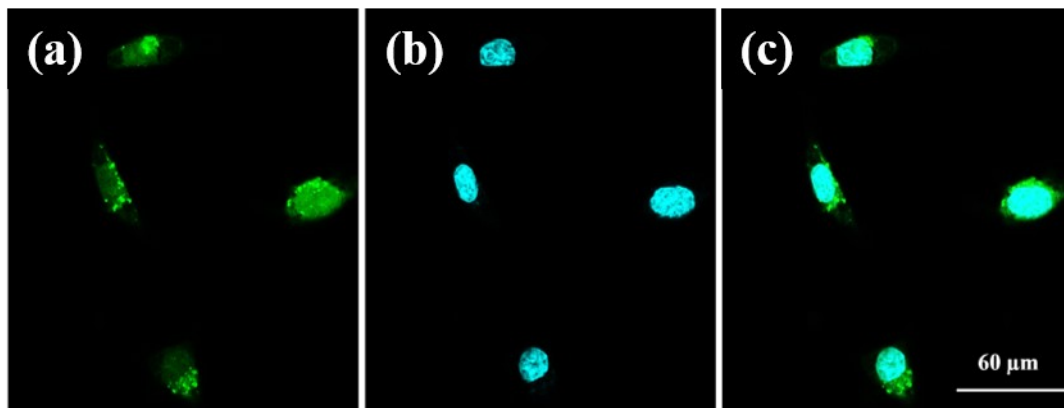

**Fig S12: (a, b,c)** Confocal images of L929 cells after performing photoporation (900 nm, 0.9 mJ/cm<sup>2</sup>, 50 pulses) revealing EGFP delivery, nucleus staining using Hoechst 33342 dye and merged image, respectively.



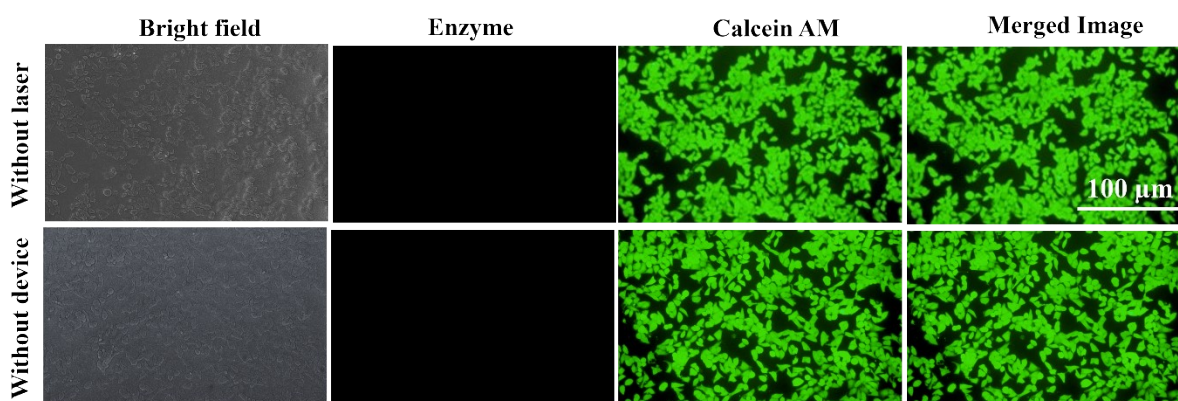

**Fig S13: Enzyme delivery in controls.** Images captured after performing photoporation without rGO mixed PDMS pyramidal microtip device (top row) and with device in the absence of laser.

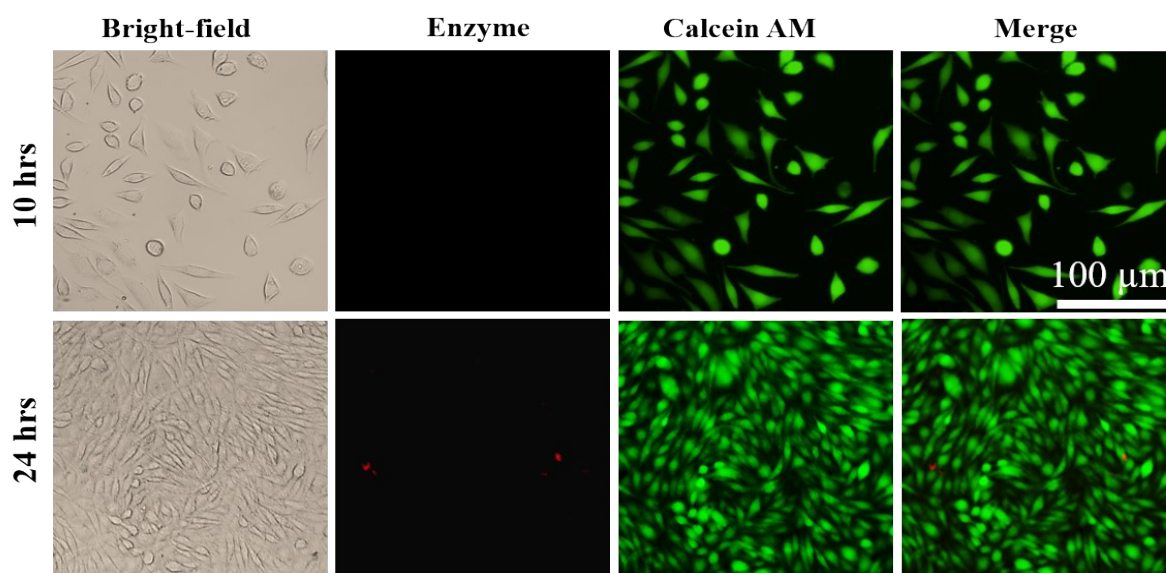

**Fig S14: Control experiments to check endocytosis or micropinocytosis induced delivery:** Microscopic images captured after incubating cells with enzymes for 10 hrs and 24 hrs.

**Table S3:** Comparison of our delivery platform with existing intracellular delivery platform

| <b>Parameters</b>                    | <b>Mechanoporation</b><br>14 | <b>Photoporation</b><br>15 | <b>Photoporation using rGO mixed Microtip device (present work)</b> |
|--------------------------------------|------------------------------|----------------------------|---------------------------------------------------------------------|
| <b>Technique used</b>                | Lithography                  | Lithography                | Lithography                                                         |
| <b>Intracellular Delivery Method</b> | Puncture loading             | Nanosecond pulse laser     | Nanosecond Pulse laser                                              |

|                                 |                                                  |                                                    |                                                                                                 |
|---------------------------------|--------------------------------------------------|----------------------------------------------------|-------------------------------------------------------------------------------------------------|
| <b>Nanostructures materials</b> | Silicon nanoneedles                              | Silicon microneedles                               | rGO                                                                                             |
| <b>Wavelength</b>               | --                                               |                                                    | Infrared (900 nm)                                                                               |
| <b>Biomolecules Delivered</b>   | Dextran 70/500,<br>Calcein                       | Dextran<br>10/70/150/500/2000,<br>Calcein          | PI, Dextran, EGFP<br>plasmid, Cas9 plasmid,<br>Enzyme                                           |
| <b>Delivery Efficiency</b>      | Calcein – <b>50%</b><br>Dextran 500 - <b>20%</b> | Dextran 10- <b>80%</b><br>Dextran 2000- <b>18%</b> | PI - SiHa: <b>96%</b> ,<br>Dextran – SiHa: <b>97%</b><br>Enzyme (465 kDa) -<br>SiHa: <b>95%</b> |
| <b>Cell Viability</b>           | Calcein- <b>80%</b><br>Dextran 500 – <b>95%</b>  | Dextran 10- <b>97%</b><br>Dextran 2000- <b>94%</b> | PI - SiHa: <b>97%</b><br>Dextran – SiHa: <b>97%</b><br>Enzyme - SiHa: <b>98%</b>                |

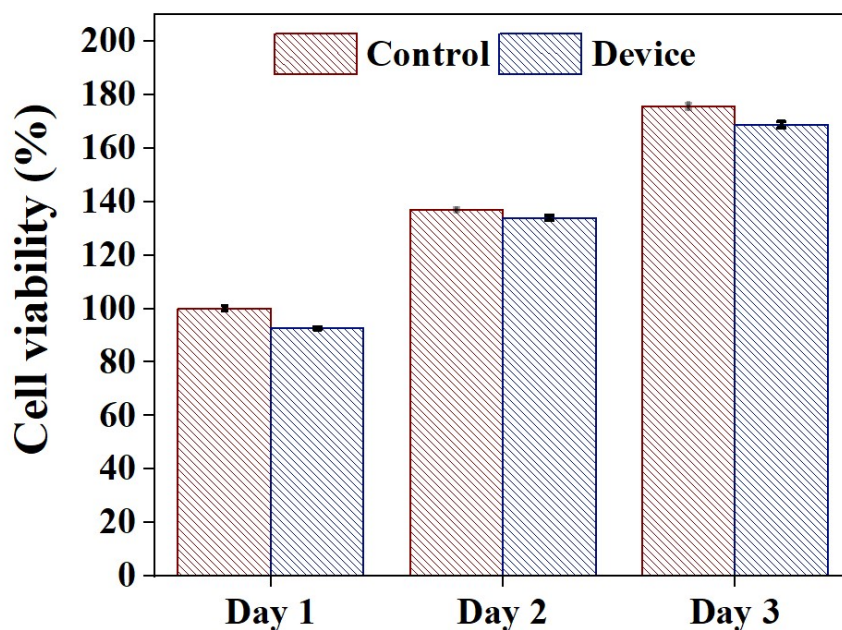

**Fig S15:** Cell viability results in L929 cells using MTT assay for three days after laser exposure with wavelength at 900 nm, fluence of 0.9 mJ/cm<sup>2</sup>, and 50 pulses in rGO mixed PDMS microtip device.

## References

- 1 L. Raes, S. Stremersch, J. C. Fraire, T. Brans, G. Goetgeluk, S. De Munter, L. Van Hoecke, R. Verbeke, J. Van Hoeck, R. Xiong, X. Saelens, B. Vandekerckhove, S. De Smedt, K. Raemdonck and K. Braeckmans, *Nano-Micro Lett.*, 2020, **12**, 1–17.
- 2 L. Raes, M. Pille, A. Harizaj, G. Goetgeluk, J. Van Hoeck, S. Stremersch, J. C. Fraire, T. Brans, O. G. de Jong, R. Maas-Bakker, E. Mastrobattista, P. Vader, S. C. De Smedt, B. Vandekerckhove, K. Raemdonck and K. Braeckmans, *Mol. Ther. - Nucleic Acids*, 2021, **25**, 696–707.
- 3 S. Kumar, A. Li, N. N. Thadhani and M. R. Prausnitz, *Nanomedicine Nanotechnology, Biol. Med.*, 2021, **37**, 102431.
- 4 Z. Lyu, F. Zhou, Q. Liu, H. Xue, Q. Yu and H. Chen, *Adv. Funct. Mater.*, 2016, **26**, 5787–5795.
- 5 L. Raes, C. Van Hecke, J. Michiels, S. Stremersch, J. C. Fraire, T. Brans, R. Xiong, S. De Smedt, L. Vandekerckhove, K. Raemdonck and K. Braeckmans, *Crystals*, 2019, **9**, 411.
- 6 J. Liu, C. Li, T. Brans, A. Harizaj, S. Van de Steene, T. De Beer, S. De Smedt, S. Szunerits, R. Boukherroub, R. Xiong and K. Braeckmans, *Int. J. Mol. Sci.*, 2020, **21**, 1540.
- 7 Q.-Y. Li, K. Xia, J. Zhang, Y. Zhang, Q. Li, K. Takahashi and X. Zhang, *Nanoscale*, 2017, **9**, 10784–10793.
- 8 L. Torrisi, M. Cutroneo, A. Torrisi and L. Silipigni, *Phys. status solidi*, 2022, **219**, 1–9.
- 9 C. H. Lui, K. F. Mak, J. Shan and T. F. Heinz, *Phys. Rev. Lett.*, 2010, **105**, 127404.
- 10 Y. Ma, Z. Zhang, J. Chen, K. Sääskilähti, S. Volz and J. Chen, *Carbon N. Y.*, 2018, **135**, 263–269.
- 11 S. Chen, M. Yang, B. Liu, M. Xu, T. Zhang, B. Zhuang, D. Ding, X. Huai and H. Zhang, *RSC Adv.*, 2019, **9**, 4563–4570.
- 12 Y. Liu, M. Lu, K. Wu, E. Jiao, L. Liang, J. Shi and M. Lu, *Compos. Sci. Technol.*, 2021, **213**, 108940.
- 13 E. Pop, V. Varshney and A. K. Roy, *MRS Bull.*, 2012, **37**, 1273–1281.
- 14 S. Park, S.-O. Choi, S. Paik, S. Choi, M. Allen and M. Prausnitz, *Biomed. Microdevices*, 2016, **18**, 10.
- 15 N. Saklayen, S. Kalies, M. Madrid, V. Nuzzo, M. Huber, W. Shen, J. Sinanan-Singh, D. Heinemann, A. Heisterkamp and E. Mazur, *Biomed. Opt. Express*, 2017, **8**, 4756.
